# Supplementary material
Source: PubMed Central journal article supplement (PMC3896386)
Supplement: NIHMS535454-supplement-1_si_001.pdf [file NIHMS535454-supplement-1_si_001.pdf]

**SUPPORTING INFORMATION FOR**

**Novel Carvedilol Analogs that Suppress Store Overload Induced Ca<sup>2+</sup> Release**

Chris D. Smith, Aixia Wang, Kannan Vembaiyan, Jingqun Zhang, Cuihong Xie,

Qiang Zhou, Guogen Wu, S. R. Wayne Chen and Thomas G. Back

| <b>Contents</b>                                                                             | <b>Page No.</b> |
|---------------------------------------------------------------------------------------------|-----------------|
| Elemental analyses of compounds <b>8, 10, 15, 28, 38, 41, 42, 47, 50-53</b>                 | SI 2            |
| Elemental analyses of compounds in the range <b>54-57, 60-62, 64, 67-69, 71, 84, 87, 90</b> | SI 3            |
| Elemental analyses of compounds in the range <b>91-94, 97, 98, 101</b>                      | SI 4            |

Table 1. Elemental analyses

| Compound | Formula               | Calculated                      | Found                           |
|----------|-----------------------|---------------------------------|---------------------------------|
| 8        | $C_{23}H_{24}N_2O_3$  | C, 73.38<br>H, 6.43<br>N, 7.44  | C, 72.98<br>H, 6.26<br>N, 7.35  |
| 10       | $C_{24}H_{26}N_2O_3$  | C, 73.81<br>H, 6.71<br>N, 7.18  | C, 73.42<br>H, 6.65<br>N, 7.05  |
| 15       | $C_{22}H_{23}N_3O_3$  | C, 70.01<br>H, 6.14<br>N, 11.13 | C, 69.94<br>H, 6.15<br>N, 11.07 |
| 28       | $C_{24}H_{22}N_2O_5$  | C, 68.89<br>H, 5.30<br>N, 6.69  | C, 68.47<br>H, 5.28<br>N, 6.57  |
| 38       | $C_{24}H_{26}N_2O_3$  | C, 73.82<br>H, 6.71<br>N, 7.17  | C, 73.47<br>H, 6.55<br>N, 7.13  |
| 41       | $C_{26}H_{26}N_2O_5$  | C, 69.94<br>H, 5.87<br>N, 6.27  | C, 69.61<br>H, 6.19<br>N, 5.98  |
| 42       | $C_{25}H_{26}N_2O_6S$ | C, 62.23<br>H, 5.43<br>N, 5.81  | C, 61.94<br>H, 5.03<br>N, 5.59  |
| 47       | $C_{24}H_{25}FN_2O_4$ | C, 67.91<br>H, 5.94<br>N, 6.60  | C, 67.70<br>H, 5.92<br>N, 6.40  |
| 50       | $C_{25}H_{28}N_2O_4$  | C, 71.41<br>H, 6.71<br>N, 6.66  | C, 71.12<br>H, 6.56<br>N, 6.54  |
| 51       | $C_{27}H_{28}N_2O_5$  | C, 70.42<br>H, 6.13<br>N, 6.08  | C, 70.37<br>H, 6.18<br>N, 5.88  |
| 52       | $C_{26}H_{26}N_2O_5$  | C, 69.94<br>H, 5.87<br>N, 6.27  | C, 69.90<br>H, 5.78<br>N, 6.25  |
| 53       | $C_{24}H_{25}FN_2O_4$ | C, 67.91<br>H, 5.94<br>N, 6.60  | C, 67.40<br>H, 5.91<br>N, 6.46  |

|           |                           |                                 |                                 |
|-----------|---------------------------|---------------------------------|---------------------------------|
| <b>54</b> | $C_{24}H_{24}F_2N_2O_4$   | C, 65.15<br>H, 5.47<br>N, 6.33  | C, 64.97<br>H, 5.47<br>N, 6.23  |
| <b>55</b> | $C_{24}H_{25}FN_2O_4$     | C, 67.91<br>H, 5.94<br>N, 6.60  | C, 67.73<br>H, 5.74<br>N, 6.57  |
| <b>56</b> | $C_{24}H_{23}F_3N_2O_3$ : | C, 64.86<br>H, 5.22<br>N, 6.30  | C, 64.56<br>H, 5.19<br>N, 6.16. |
| <b>57</b> | $C_{23}H_{23}FN_2O_3$     | C, 70.04<br>H, 5.88<br>N, 7.10  | C, 70.05<br>H, 5.74<br>N, 6.99  |
| <b>60</b> | $C_{44}H_{60}N_2O_6$      | C, 74.12<br>H, 8.48<br>N, 3.93  | C, 74.05<br>H; 8.74<br>N, 3.78  |
| <b>61</b> | $C_{24}H_{30}N_2O_4$      | C, 70.22<br>H, 7.37<br>N, 6.82  | C, 70.07<br>H, 7.28<br>N, 6.74  |
| <b>62</b> | $C_{25}H_{27}NO_4$        | C, 74.05<br>H, 6.71<br>N, 3.45  | C, 74.02<br>H, 7.05<br>N, 3.51  |
| <b>64</b> | $C_{24}H_{25}NO_5$        | C, 70.74<br>H, 6.18<br>N, 3.44  | C, 70.25<br>H, 6.20<br>N, 3.33  |
| <b>67</b> | $C_{24}H_{26}N_2O_6S$     | C, 61.26<br>H, 5.57<br>N, 5.95  | C, 60.92<br>H, 5.29<br>N, 5.95  |
| <b>68</b> | $C_{22}H_{25}NO_4$        | C, 71.91<br>H, 6.86<br>N, 3.81  | C, 71.88<br>H, 6.89<br>N, 3.79  |
| <b>69</b> | $C_{23}H_{27}NO_4$        | C, 72.42<br>H, 7.13<br>N, 3.67  | C, 72.00<br>H, 6.96<br>N, 3.59  |
| <b>71</b> | $C_{22}H_{33}NO_4$        | C, 70.37<br>H, 8.86<br>N, 3.73  | C, 70.05<br>H, 8.88<br>N, 3.64  |
| <b>84</b> | $C_{23}H_{20}N_2O_4$      | C, 71.12<br>H, 5.19<br>N, 7.21  | C, 70.65<br>H, 5.05<br>N, 7.30  |
| <b>87</b> | $C_{23}H_{22}N_2O_3$      | C, 73.78<br>H, 5.92<br>N, 7.48  | C, 73.34<br>H, 5.94<br>N, 7.27  |
| <b>90</b> | $C_{25}H_{27}N_3O_2$      | C, 74.79<br>H, 6.78<br>N, 10.47 | C, 74.23<br>H, 6.71<br>N, 10.34 |

|            |                          |                                |                                |
|------------|--------------------------|--------------------------------|--------------------------------|
| <b>91</b>  | $C_{24}H_{22}N_2O_4$     | C, 71.63<br>H, 5.51<br>N, 6.96 | C, 71.14<br>H, 5.17<br>N, 6.51 |
| <b>92</b>  | $C_{28}H_{26}N_2O_4$     | C, 73.99<br>H, 5.77<br>N, 6.16 | C, 73.87<br>H, 5.83<br>N, 6.09 |
| <b>93</b>  | $C_{23}H_{22}N_2O_4$     | C, 70.75<br>H, 5.68<br>N, 7.17 | C, 70.57<br>H, 5.94<br>N, 7.01 |
| <b>94</b>  | $C_{24}H_{24}N_2O_5$     | C, 68.56<br>H, 5.75<br>N, 6.66 | C, 68.67<br>H, 5.96<br>N, 6.49 |
| <b>97</b>  | $C_{24}H_{24}Br_2N_2O_4$ | C, 51.09<br>H, 4.29<br>N, 4.96 | C, 50.69<br>H, 4.31<br>N, 4.75 |
| <b>98</b>  | $C_{26}H_{24}Br_2N_2O_5$ | C, 51.68<br>H, 4.00<br>N, 4.64 | C, 51.51<br>H, 3.86<br>N, 4.52 |
| <b>101</b> | $C_{11}H_{15}NO$         | C, 63.12<br>H, 7.22<br>N, 6.69 | C, 63.11<br>H, 7.53<br>N, 6.98 |
